# Supplementary material for: New and known free-living nematode species (Nematoda: Chromadorea) from offshore tsunami monitoring buoys in the Southwest Pacific Ocean
Source: PeerJ. 2025 Jul 30;13:e19789. doi: 10.7717/peerj.19789 (PMC12317693; doi:10.7717/peerj.19789)
Supplement: Supplemental Information 1 — Male and female traits are shown on separate tabs. calc: calculated from original publication (drawings or tables). [file peerj-13-19789-s001.xlsx]

## Sheet: males
Comparison of Halomonhystera species (males). Emended from Tchesunov et al. (2015)
	L, mm	a	b	c	c'	Width of the amphideal fovea, mm; as percentage of cbd (*)	Distance from cephalic apex to anterior rim of amphideal fovea, mm	Distance from cephalic apex to anterior rim of amphideal fovea divided by body diameter at level of cephalic setae	Total stoma length, mm	Spicule length, mm
anoxybiotica comb. nov.	600-740	40–49	6.7–6.9	8.0–9.0	6.3 calc	4	8 calc	1.1 calc	3 calc	14
antarctica	900	33	7.5	11	3.6	33*	?	1.3–1.4	?	34–40
bathislandica	572–684	36–39	5.3–6.2	7.4–7.5	5.5–6	4; 45*	15	2	6	22
cameroni	1054	40	7.3	11	3.3–3.6	25*	?	2–3	8	38
chitwoodi	1450	34	9.8	9.8	4.4	25*	11	1	?	42
continentalis	420–560	20–23	5–5.6	10–11	2.1–2.5	33*	9–12	1.2–1.8	4–6	26–30
disjuncta	800–1,500	24–35	6.2–10	11–20	2–3	25*	?	<2	?	27–42
fisheri	680–860	28–41	6.7–7.2	9.1–9.9	4.3–4.8	50*	12–14	2.1 calc	5	27–29
glaciei	2,200–2,500	81–91	7.3–8.2	11–20	6.3	29*	26	2–2.5	?	36–40
halophila	820–1,330	29–38	7–10	11–13	2.7–3.6	25*	22–30	0.8–1.2	10–12	44–53
hermesi	688–1,038	23–39	3.9–6.2	7.9–10.6	3–4.2	3–4; 20–24*	11–18	0.7–1.4	6.4–8.5	32–50
hickeyi	605–740	30–34	6.1–6.7	10–11	3.3	50*	11	1.5 calc	?	25–30
islandica	380–400	26–29	5.1–5.5	7.7–8	4.3–4.7	33–35*	9.5–10.3	1.7 calc	3	14–19
paradisjuncta	600	27	5.4	10	2.8	20–25*	12–18	1.6 calc	5	39
parasitica	900–1,100	25–29	4.8–5.7	8–9	4.2calc	4; 22* calc	18	2	7	41–44
refringens comb. nov.	536-665	24-29	5–6	6	4.6–4.7	25–33	6–7	0.6–0.7	4–6	39–40
rotundicapitata	850	26	6	8	4	22* calc	14.5 calc	1.2	8	26
socialis	1,875–3,590	42–60	6.7–10.6	12–21	3.2–5	4–5.5; 21–33.3*	14–23	1.1–1.5	5–11	46–96
tangaroa	660–817	33–38	6–7	10–12	3–3.8	4; 29–33*	11–14	1.2 calc	6	27–34
taurica	724–979	32–43	6.7–8.3	13–17	2.5–3.5	3–4; 25* calc	13–14	1.4 calc	?	23–30
uniformis	460	40	5	6.7	6.5	25*	?	2–2.5	?	26
vandoverae	605–760	33–35	6–7	8–10	4	40*	12–14	?	5	23–30
calc: calculated from original publication (drawings or tables)

## Sheet: females
Comparison of Halomonhystera species (females). Emended from Tchesunov et al. (2015)
	L, mm	a	b	c	c'	%V	Distance from vulva to anus divided by tail length, mm	Distance from vulva to anus divided by anal body diameter	Width of the amphideal fovea, as percentage of cbd	Distance from cephalic apex to anterior rim of amphideal fovea divided by body diameter at level of cephalic setae	Reproduction mode
anoxybiotica comb. nov.	680-790	41-61	6.3-8.5	6.0-8.4	6.3 calc	58-64	1.8 calc	?	31 calc	1.4 calc	?
antarctica	900	27	7.3	14	2.5	89	0.5	>1	33	1.3–1.4	?
bathislandica	615–633	24–27	5.4–5.7	7.8–7.9	6.5–7	64–67	1.7–1.9	12 calc	29–31	2.13 calc	?oviparous
cameroni	760–792	30–38	6.5–7	9–13	4–5	86–88	0.29–0.33	1	25	2–3	oviparous
chitwoodi	1020	28	7.7	8.2	5	76	1	4–5	25	1	viviparous
continentalis	520–580	20–24	5.7–5.9	9–11	3.6–4.7	85–87	0.33–0.42	1.2–1.6	33	1.2–1.8	?
disjuncta	800–1,500	16–37	5.7–10	9–15	3–4	82–92	0.3–0.4	1.5	25	< 2	viviparous
fisheri	700–775	29–36	5.8–6.6	7.8–9.1	5.2 calc	66–68	1.5–1.7	12 calc	?	?	viviparous
glaciei	2,028–2,420	61–67	7.1–8.1	13–15	6–7	86–87	0.8–1.1	6.6	?	2.3	oviparous
halophila	1,000–1,270	22–32	8.3–10	8.8–12.3	3.8–5.4	85–89	0.29–0.45	1.6–2.3	C25	0.8–1.2	viviparous
hermesi	635–1,082	18–27	4.1–5.9	8.4–11.3	4.6–5.5	85–89	0.23–0.39	1.1–1.8	17–28	0.7–1	viviparous
hickeyi	721–780	28–32	6.9–7.4	10–11	4.5	83–86	0.4–0.5	1.71 calc	33.8	1.78	viviparous
islandica	357–385	24–26	5.1–6.3	6–6.4	5.9–8.4	57–60	1.4–1.7	?	29	?	?
paradisjuncta	females unknown
parasitica	930–1,120	27–28	5.3–5.9	8–9	4.8 calc	84–86	0.26 calc	1.39 calc	20–27	1.43 calc	oviparous
refringens comb. nov.	570–776	22–29	5–6	6	5.0–5.2	56–59	1.5–1.7	7.4–8.6	19–22	0.6	oviparous
rotundicapitata	810	25	6	8	4.5	76	0.85 calc	4.2 calc	20	1.5	oviparous
socialis	1,900–2,200	40–50	8–9	10–11	3.4–9.3	81–94	0.17–0.25	1.2–1.8	19–28	0.9–1.6	viviparous
tangaroa	585–909	22–29	6–7	9–11	4.3–5.7	84–86	0.31–0.33	1.4–1.9	20–27	1.1–1.6	oviparous
taurica	736–882	29–33	6.7–7.5	11–13	4–5	78–90	0.16–0.28	1.14–1.81	17–28	1.5	oviparous
uniformis	440	38	5	7	6.5	83	0.33	2	25	2–2.5	oviparous
vandoverae	610–670	32–36	6.4–7.1	8.1–8.4	6.3 calc	67–72	1.5–1.7	10.8 calc	?	?	oviparous
calc: calculated from original publication (drawings or tables)
